# Supplementary material for: Size dependent electrochemical detection of trace heavy metal ions based on nano-patterned carbon sphere electrodes
Source: Royal Society of Chemistry journal article supplement (doi:10.1039/c6nr04019e), 2016-01-01
Supplement: c6nr04019e1.pdf [file c6nr04019e1.pdf]

## Supporting information

### Size Dependent Electrochemical Detection for Trace Heavy Metal Ions Based on Nano-Patterned Carbon Sphere Electrodes

Lu-Hua Zhang, Wen-Cui Li, Dong Yan, Hua Wang, and An-Hui Lu\*

State Key Laboratory of Fine Chemicals, School of Chemical Engineering, Dalian University of Technology, Dalian 116024, P. R. China. E-mail: anhuilu@dlut.edu.cn. Tel/Fax: +86-411-84986112

#### Part I:

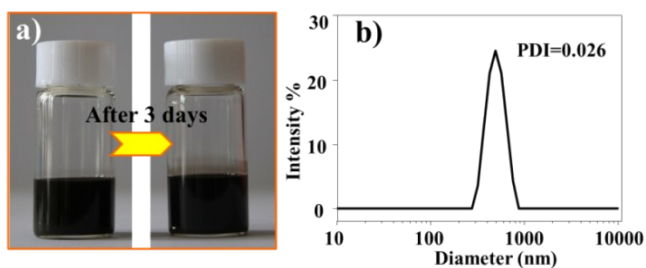

**Fig. S1** (a) Photograph of the dispersed solution of HCSs. (b) Representative DLS curves of the HCS-188-44. (PDI=polydispersity index).

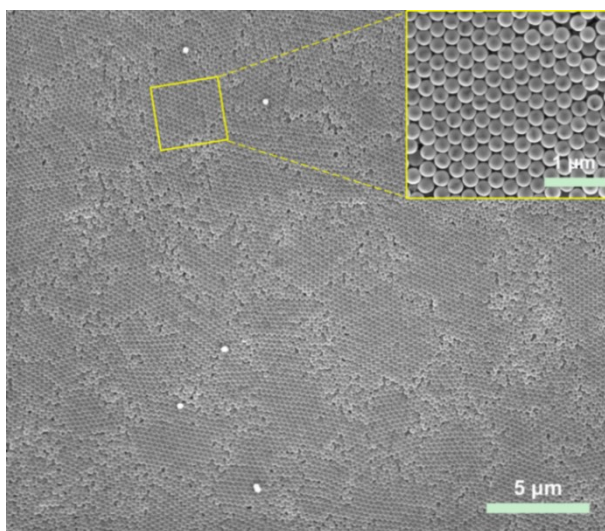

**Fig. S2.** SEM images of the self-assembled HCSs.

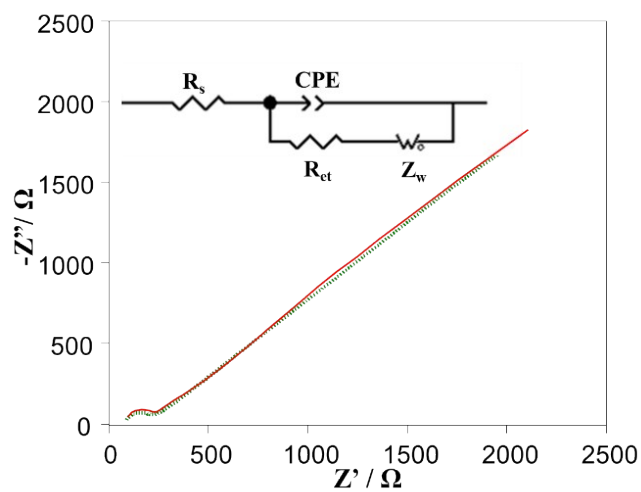

**Fig. S3** Nyquist plots of HCS-188-55 modified GCE. Solid red line, measurement data; dot green line, fitting data.

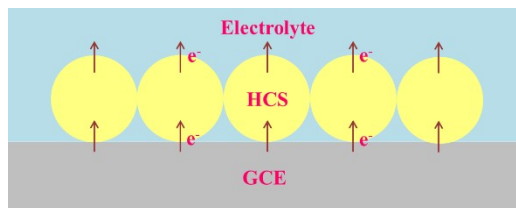

**Fig. S4** Schematic illustration of electron transfer pathways.

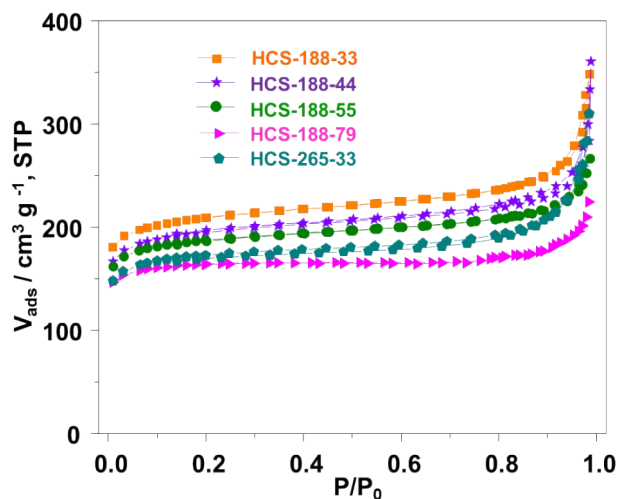

**Fig. S5.** N<sub>2</sub> sorption isotherms of HCS-x-y samples. Note: the isotherms of samples HCS-188-55, HCS-188-44, and HCS-188-33 are vertically offset by 10, 20, 30 cm<sup>3</sup> g<sup>-1</sup>, respectively.

**Table S1. Textural properties of HCS-x-y samples<sup>a</sup>**

| Sample     | $S_{\text{BET}}$<br>( $\text{m}^2 \text{g}^{-1}$ ) | $S_{\text{mic}}$<br>( $\text{m}^2 \text{g}^{-1}$ ) | $V_{\text{total}}$<br>( $\text{cm}^3 \text{g}^{-1}$ ) | $V_{\text{mic}}$<br>( $\text{cm}^3 \text{g}^{-1}$ ) |
|------------|----------------------------------------------------|----------------------------------------------------|-------------------------------------------------------|-----------------------------------------------------|
| HCS-265-33 | 588                                                | 537                                                | 0.30                                                  | 0.24                                                |
| HCS-188-33 | 607                                                | 541                                                | 0.32                                                  | 0.25                                                |
| HCS-188-44 | 603                                                | 554                                                | 0.32                                                  | 0.26                                                |
| HCS-188-55 | 600                                                | 544                                                | 0.31                                                  | 0.25                                                |
| HCS-188-79 | 580                                                | 531                                                | 0.25                                                  | 0.23                                                |

<sup>a</sup> $S_{\text{BET}}$  = specific surface area calculated by the BET method,  $S_{\text{mic}}$  = micropore surface area calculated by the t-plot method,  $V_{\text{total}}$  = total pore volume at  $P/P_0 = 0.90$ , and  $V_{\text{mic}}$  = micropore volume calculated by the t-plot method.

**Table S2. Synthesis conditions and structure parameters of HCSs**

| Sample     | $D_{\text{PS}}^{\text{a}}$<br>(nm) | Phenol<br>(mg) | HMT<br>(mg) | $T_{\text{HCS}}^{\text{b}}$<br>(nm) | $D_{\text{void}}^{\text{c}}$<br>(nm) |
|------------|------------------------------------|----------------|-------------|-------------------------------------|--------------------------------------|
| HCS-265-33 | 280                                | 141            | 105         | 32                                  | 265                                  |
| HCS-188-33 | 200                                | 188            | 140         | 33                                  | 188                                  |
| HCS-188-44 | 200                                | 235            | 175         | 44                                  | 188                                  |
| HCS-188-55 | 200                                | 282            | 210         | 55                                  | 188                                  |
| HCS-188-79 | 200                                | 376            | 280         | 79                                  | 188                                  |

<sup>a</sup> $D_{\text{PS}}$ : the diameter of PS template. <sup>b</sup> $T_{\text{HCS}}$ : the shell thickness of HCSs. <sup>c</sup> $D_{\text{void}}$ : the void diameter of HCSs.

## Part II:

The contact points between HCSs and GCE can be calculated as following:

We assume that HCSs have hexagonal close-packed structure on the surface of GCE. When

HCS-188-44 modified GCE, the number of contact points between HCS and GCE :

$$n = \frac{S_{GCE}}{a_u} = \frac{4\pi R_{GCE}^2}{\sqrt{3}R_{HCS}D_{HCS}} = \frac{4\pi(2 \times 10^{-3})^2}{2\sqrt{3}(138 \times 10^{-9})^2} = 7.62 \times 10^8$$

Where n is the number of contact points between HCS and GCE,  $S_{GCE}$  is the area of GCE;  $a_u$  is the area of each unit;  $R_{GCE}$  is the radius of GCE;  $R_{HCS}$ ,  $D_{HCS}$  is the radius and diameter of HCSs.
